# Supplementary material for: Clinical characteristics and prognostic nomogram analysis of patients with dual primary cancers with first gastric cancer: a retrospective study in China
Source: PeerJ. 2023 May 1;11:e15278. doi: 10.7717/peerj.15278 (PMC10158755; doi:10.7717/peerj.15278)
Supplement: Supplemental Information 1 [file peerj-11-15278-s001.xlsx]

## Sheet: Sheet1
Number	Gender	Date of birth	Weight （Kg）	Height （cm）	BMI	Smoking	Alcoholism	Family history of cancers	History of hypertension	History of coronary heart disease	History of diabetes	History of chronic obstructive pulmonary disease	First primary cancer (FPC)	Diagnostic time of FPC	Diagnostic age of FPC	Diagnostic methods of FPC	Pathological type of FPC	Histological grade of FPC	Pathological stage of FPC	Treatment of FPC	Second primary cancers (SPCs)	Diagnostic time of SPCs	Diagnostic age of SPCs	Diagnostic Interval（months）	Synchronous/Metachronous	Diagnostic methods	Pathological type of SPCs	Histological grade of SPCs	Pathological stage of SPCs	Treatment	Death time	Survival status	Survival time（months）
1	female	1950-12	57	160	22.2656	No	No	No	No	No	No	No	gastric cancer	2016-07	65	pathological biopsy	adenocarcinoma	low	I	surgery	skin cancer	2016-07	65	0	synchronous	pathological biopsy	basal cell carcinoma	low	I	surgery	2018-06	live	67
2	male	1960-01	49	175	16	No	No	No	No	No	No	No	gastric cancer	2012-07	52	pathological biopsy	adenocarcinoma	middle	III	surgery+chemotherapy	bladder cancer	2013-12	53	17	metachronous	endoscopic biopsy	urothelial carcinoma	middle	III	nutritional support	2013-12	death	17
3	male	1956-01	60	170	20.7612	No	No	No	Yes	No	No	No	gastric cancer	2018-03	62	pathological biopsy	neuroendocrine tumors	high	III	surgery+ chemotherapy	colon cancer	2019-01	63	9	metachronous	pathological biopsy	adenocarcinoma	middle	III	surgery	2019-08	death	17
4	male	1951-11	75	175	24.4898	No	No	Yes	No	No	No	No	gastric cancer	2011-04	59	pathological biopsy	adenocarcinoma	low	I	surgery	lung cancer	2016-07	64	63	metachronous	needle biopsies	small cell cancer	middle	II	nutritional support	2017-05	death	73
5	female	1966-01	60	172	20.2812	No	No	No	No	No	No	No	gastric cancer	2012-09	46	pathological biopsy	adenocarcinoma	low	I	surgery+chemotherapy	colon cancer	2012-09	46	0	synchronous	pathological biopsy	adenocarcinoma	middle	I	surgery+chemotherapy	2017-07	live	113
6	female	1950-01	49	142	24.3007	No	No	No	No	No	No	No	gastric cancer	2013-04	63	pathological biopsy	adenocarcinoma	low	II	surgery	gallbladder cancer	2015-08	65	28	metachronous	enhanced CT	adenocarcinoma	middle	II	nutritional support	2015-09	death	29
7	female	1950-01	49	142	24.3007	No	No	No	No	No	No	No	gastric cancer	2013-04	63	pathological biopsy	adenocarcinoma	low	II	surgery	gallbladder cancer	2015-08	65	28	metachronous	enhanced CT	adenocarcinoma	middle	II	nutritional support	2015-09	death	37
8	male	1954-03	66	174	21.7994	Yes	Yes	Yes	No	No	No	No	gastric cancer	2014-06	60	pathological biopsy	adenocarcinoma	low	II	surgery	pancreatic cancer	2016-03	62	21	metachronous	enhanced CT	adenocarcinoma	middle	II	nutritional support	2017-09	death	39
9	male	1933-04	60	170	20.7612	No	No	No	No	No	No	No	gastric cancer	2014-05	81	pathological biopsy	adenocarcinoma	low	I	surgery	skin cancer	2018-04	85	47	metachronous	needle biopsies	squamous cell carcinomas	high	III	radiotherapy	2018-06	death	49
10	male	1940-03	70	170	24.2215	No	No	No	No	No	No	No	gastric cancer	2015-04	75	pathological biopsy	adenocarcinoma	low	II	surgery	esophageal cancer	2016-08	76	16	metachronous	endoscopic biopsy	squamous cell carcinomas	middle	I	radiotherapy	2017-03	death	23
11	male	1948-09	64	163	24.0882	No	No	No	No	No	No	No	gastric cancer	2018-06	69	endoscopic biopsy	squamous cell carcinomas	low	III	nutritional support	colon cancer	2018-06	69	0	synchronous	endoscopic biopsy	adenocarcinoma	high	III	nutritional support	2019-01	death	2
12	male	1951-05	60	170	20.7612	No	No	No	No	No	No	No	gastric cancer	2016-04	64	pathological biopsy	adenocarcinoma	low	II	surgery+chemotherapy	colon cancer	2016-04	64	0	synchronous	pathological biopsy	adenocarcinoma	high	III	surgery+chemotherapy	survival	death	33
13	male	1974-12	71	173	23.7228	Yes	Yes	No	No	No	No	No	gastric cancer	2018-07	43	endoscopic biopsy	adenocarcinoma	low	III	chemotherapy	colon cancer	2018-08	43	1	synchronous	endoscopic biopsy	adenocarcinoma	middle	II	chemotherapy	survival	death	1
14	male	1970-03	72	176	23.2438	No	No	No	No	No	No	No	gastric cancer	2015-03	45	pathological biopsy	adenocarcinoma	low	II	surgery	rectal cancer	2017-09	47	30	metachronous	pathological biopsy	adenocarcinoma	low	II	surgery+chemotherapy	2018-02	death	35
15	male	1968-06	56	165	20.5693	Yes	Yes	No	No	No	No	No	gastric cancer	2015-10	47	pathological biopsy	adenocarcinoma	low	II	surgery+chemotherapy	rectal cancer	2018-07	50	33	metachronous	endoscopic biopsy	adenocarcinoma	middle	II	radiotherapy	2018-09	death	35
16	male	1932-07	62	170	21.4533	No	No	No	No	No	No	No	gastric cancer	2016-10	84	endoscopic biopsy	adenocarcinoma	low	II	nutritional support	esophageal cancer	2016-12	84	2	synchronous	endoscopic biopsy	squamous cell carcinomas	low	I	nutritional support	2018-05	death	19
17	male	1943-09	57	169	19.9573	Yes	Yes	No	No	Yes	No	Yes	gastric cancer	2018-01	74	pathological biopsy	adenocarcinoma	low	III	surgery	esophageal cancer	2018-08	74	7	metachronous	endoscopic biopsy	squamous cell carcinomas	high	II	nutritional support	2018-08	death	7
18	female	1955-04	48	152	20.7756	No	No	No	No	No	No	No	gastric cancer	2013-05	58	pathological biopsy	adenocarcinoma	low	II	surgery	colon cancer	2018-03	61	58	metachronous	endoscopic biopsy	adenocarcinoma	middle	III	chemotherapy	2019-01	death	68
19	male	1972-02	69	171	23.597	No	No	No	No	Yes	No	Yes	gastric cancer	2015-01	42	pathological biopsy	adenocarcinoma	low	II	surgery	gallbladder cancer	2017-01	44	24	metachronous	pathological biopsy	adenocarcinoma	middle	II	surgery+chemotherapy	2018-07	death	6
20	male	1932-08	58	165	21.3039	Yes	No	No	No	No	No	No	gastric cancer	2014-11	82	pathological biopsy	adenocarcinoma	low	II	nutritional support	lung cancer	2014-11	82	0	synchronous	needle biopsies	adenocarcinoma	high	II	nutritional support	2015-03	death	4
21	female	1944-07	46	162	17.5278	No	No	No	No	Yes	No	No	gastric cancer	2017-05	72	endoscopic biopsy	signet ring cell carcinoma	low	III	nutritional support	colon cancer	2017-05	72	0	synchronous	endoscopic biopsy	adenocarcinoma	middle	III	nutritional support	2017-06	death	2
22	female	1948-09	49	168	17.3611	Yes	Yes	No	No	No	No	No	gastric cancer	2017-01	68	pathological biopsy	GIST	low	III	surgery	rectal cancer	2017-01	68	0	synchronous	endoscopic biopsy	hyperplasia	middle	III	chemotherapy	2019-02	death	2
23	male	1954-03	60	171	20.5191	Yes	Yes	No	No	No	Yes	No	gastric cancer	2017-03	63	pathological biopsy	adenocarcinoma	low	II	surgery+chemotherapy	lung cancer	2019-05	65	50	metachronous	pathological biopsy	adenocarcinoma	middle	I	surgery+radiotherapy	2019-09	death	30
24	male	1937-06	71	170	24.5675	No	No	No	No	No	No	No	gastric cancer	2015-06	78	pathological biopsy	adenocarcinoma	low	II	surgery	gallbladder cancer	2017-05	80	23	metachronous	pathological biopsy	adenocarcinoma	middle	IV	surgery	2017-06	death	24
25	female	1961-03	60	160	23.4375	No	No	No	No	No	No	No	gastric cancer	2012-04	51	pathological biopsy	adenocarcinoma	low	III	surgery	lung cancer	2015-03	54	37	metachronous	needle biopsies	adenocarcinoma	high	II	chemotherapy	2015-09	death	41
26	male	1955-08	65	177	20.7476	Yes	No	No	No	No	No	No	gastric cancer	2019-02	63	pathological biopsy	adenocarcinoma	low	II	surgery	cholangiocarcinoma	2019-02	63	0	synchronous	endoscopic biopsy	adenocarcinoma	middle	III	surgery	2017-06	death	2
27	male	1951-09	46	168	16.2982	No	No	No	No	No	No	No	gastric cancer	2014-06	62	pathological biopsy	adenocarcinoma	low	I	surgery+chemotherapy	cholangiocarcinoma	2020-03	68	69	metachronous	endoscopic biopsy	adenocarcinoma	low	II	nutritional support	2020-03	death	69
28	male	1933-05	53	166	19.2336	No	No	No	No	No	No	No	gastric cancer	2017-05	84	pathological biopsy	adenocarcinoma	low	II	surgery	pancreatic cancer	2019-04	86	23	metachronous	enhanced CT	adenocarcinoma	middle	IV	nutritional support	2019-09	death	28
29	female	1957-09	65	155	27.0552	No	No	No	No	No	No	No	gastric cancer	2017-11	60	pathological biopsy	adenocarcinoma	low	II	surgery+chemotherapy	breast cancer	2017-11	60	0	synchronous	pathological biopsy	adenocarcinoma	low	I	surgery+chemotherapy	2018-01	death	24
30	male	1945-04	55	178	17.3589	Yes	Yes	No	No	No	No	No	gastric cancer	2014-05	69	endoscopic biopsy	adenocarcinoma	low	II	surgery	lung cancer	2016-07	71	50	metachronous	pathological biopsy	squamous cell carcinomas	low	I	surgery+chemotherapy	2016-10	death	29
31	female	1970-04	50	167	17.9282	No	No	No	No	No	No	No	gastric cancer	2018-05	48	pathological biopsy	adenocarcinoma	high	III	surgery+chemotherapy	pancreatic cancer	2018-05	48	0	synchronous	pathological biopsy	adenocarcinoma	middle	II	surgery+chemotherapy	2018-08	live	45
32	male	1957-07	46	174	15.1936	Yes	No	No	No	No	No	No	gastric cancer	2012-11	55	pathological biopsy	adenocarcinoma	low	II	surgery	rectal cancer	2015-09	58	34	metachronous	pathological biopsy	adenocarcinoma	low	III	surgery+chemotherapy	2015-10	death	35
33	male	1941-04	54	168	19.1327	No	Yes	No	No	No	No	No	gastric cancer	2015-12	74	endoscopic biopsy	adenocarcinoma	low	II	nutritional support	kidney cancer	2015-12	74	0	synchronous	needle biopsies	clear cell carcinoma	middle	III	nutritional support	2015-12	death	2
34	female	1940-06	45	160	17.5781	No	No	No	Yes	Yes	No	No	gastric cancer	2017-03	76	endoscopic biopsy	adenocarcinoma	low	II	nutritional support	esophageal cancer	2017-03	76	0	synchronous	endoscopic biopsy	squamous cell carcinomas	high	III	nutritional support	2017-05	death	2
35	female	16834	50	160	19.5312	No	No	No	Yes	No	No	No	gastric cancer	2014-07	68	pathological biopsy	adenocarcinoma	low	II	surgery	prostate cancer	2018-04	72	45	metachronous	needle biopsies	adenocarcinoma	low	I	nutritional support	2018-04	death	45
36	female	1953-01	41	158	16.4237	Yes	No	No	No	No	No	No	gastric cancer	2018-03	65	pathological biopsy	adenocarcinoma	low	III	surgery	esophageal cancer	2018-09	65	6	synchronous	endoscopic biopsy	adenocarcinoma	low	IV	nutritional support	2019-01	death	10
37	male	1969-07	70	170	24.2215	No	No	No	No	No	No	No	gastric cancer	2014-03	44	pathological biopsy	adenocarcinoma	low	II	surgery	pancreatic cancer	2018-04	48	49	metachronous	enhanced CT	adenocarcinoma	middle	II	nutritional support	2018-08	death	53
38	male	1971-03	61	160	23.8281	Yes	Yes	No	No	Yes	No	No	gastric cancer	2015-06	44	pathological biopsy	adenocarcinoma	low	III	surgery	gallbladder cancer	2017-04	46	22	metachronous	pathological biopsy	adenocarcinoma	middle	II	surgery+chemotherapy	2017-11	death	29
39	male	1953-01	45	165	16.5289	No	No	No	No	No	No	No	gastric cancer	2016-06	63	pathological biopsy	adenocarcinoma	low	III	surgery	lung cancer	2018-08	65	26	metachronous	pathological biopsy	adenocarcinoma	high	II	surgery+chemotherapy	2018-09	death	27
40	female	1974-08	27	160	10.5469	No	No	No	No	No	No	No	gastric cancer	2016-07	41	pathological biopsy	adenocarcinoma	low	II	surgery+chemotherapy	rectal cancer	2018-06	43	23	metachronous	pathological biopsy	adenocarcinoma	middle	II	surgery	2018-12	death	29
41	male	1958-03	57	168	20.1956	Yes	Yes	No	Yes	No	No	No	gastric cancer	2016-04	58	pathological biopsy	adenocarcinoma	low	III	surgery	esophageal cancer	2016-04	58	0	synchronous	pathological biopsy	adenocarcinoma	low	II	surgery	2017-09	death	7
42	female	1950-06	63	170	21.7993	No	No	No	Yes	No	No	No	gastric cancer	2016-07	66	pathological biopsy	adenocarcinoma	low	II	surgery+chemotherapy	colon cancer	2018-03	68	20	metachronous	pathological biopsy	adenocarcinoma	high	II	surgery	2018-09	death	26
43	female	1954-08	55	160	21.4844	No	No	No	No	No	No	No	gastric cancer	2017-08	63	pathological biopsy	adenocarcinoma	low	III	surgery	rectal cancer	2017-08	63	0	synchronous	pathological biopsy	adenocarcinoma	middle	II	surgery	2016-03	death	12
44	male	1947-01	50	170	17.301	No	No	No	No	Yes	No	No	gastric cancer	2018-03	71	endoscopic biopsy	adenocarcinoma	low	III	chemotherapy	lung cancer	2018-03	71	0	synchronous	needle biopsies	squamous cell carcinomas	low	II	chemotherapy	2018-07	death	11
45	male	1944-09	72	175	23.5102	No	Yes	No	No	No	No	No	gastric cancer	2017-03	72	endoscopic biopsy	signet ring cell carcinoma	low	III	chemotherapy	colon cancer	2017-03	72	0	synchronous	endoscopic biopsy	adenocarcinoma	low	II	chemotherapy	2015-08	death	3
46	male	1949-01	70	174	23.1206	No	No	No	No	No	No	No	gastric cancer	2014-09	65	pathological biopsy	adenocarcinoma	low	I	surgery	pancreatic cancer	2017-08	68	35	metachronous	enhanced CT	adenocarcinoma	low	I	nutritional support	2019-12	death	63
47	female	1961-12	46	155	19.1467	No	No	No	No	No	No	No	gastric cancer	2013-02	51	pathological biopsy	adenocarcinoma	low	III	surgery	rectal cancer	2016-08	54	42	metachronous	pathological biopsy	adenocarcinoma	middle	II	surgery	survival	live	108
48	male	1949-09	55	170	19.0311	No	No	No	Yes	No	No	No	gastric cancer	2016-07	66	pathological biopsy	adenocarcinoma	low	II	surgery	colon cancer	2017-02	67	7	metachronous	pathological biopsy	adenocarcinoma	low	II	surgery+chemotherapy	2019-06	death	35
49	female	1945-07	47	160	18.3594	No	No	No	No	No	No	No	gastric cancer	2015-02	69	pathological biopsy	adenocarcinoma	low	III	surgery	colon cancer	2018-03	72	37	metachronous	pathological biopsy	adenocarcinoma	middle	I	surgery+chemotherapy	2018-04	death	38
50	female	1974-04	42	164	15.6157	No	No	No	No	No	No	No	gastric cancer	2017-07	43	pathological biopsy	adenocarcinoma	low	III	surgery+chemotherapy	pancreatic cancer	2017-07	43	0	synchronous	pathological biopsy	adenocarcinoma	middle	III	surgery+chemotherapy	2018-11	death	2
51	female	1939-05	50	150	22.2222	No	No	No	No	No	No	No	gastric cancer	2018-02	79	endoscopic biopsy	adenocarcinoma	low	II	nutritional support	esophageal cancer	2018-02	79	0	synchronous	endoscopic biopsy	adenocarcinoma	high	I	nutritional support	2018-11	death	6
52	male	1953-06	46	160	17.9687	No	No	No	No	No	No	No	gastric cancer	2016-12	63	pathological biopsy	adenocarcinoma	low	II	surgery+chemotherapy	bladder cancer	2017-06	64	6	synchronous	endoscopic biopsy	urothelial carcinoma	low	I	nutritional support	2018-06	death	6
53	male	1936-12	50	170	17.301	No	No	No	No	No	No	No	gastric cancer	2009-06	72	pathological biopsy	adenocarcinoma	low	II	surgery	rectal cancer	2011-10	74	28	metachronous	pathological biopsy	hyperplasia	middle	III	surgery	2015-06	death	72
54	male	1962-05	52	155	21.6441	No	No	No	No	No	No	No	gastric cancer	2016-09	54	pathological biopsy	adenocarcinoma	low	III	surgery+chemotherapy	cholangiocarcinoma	2016-10	54	1	synchronous	pathological biopsy	adenocarcinoma	low	IV	surgery+chemotherapy	2019-11	death	26
55	male	1958-01	57	165	20.9366	Yes	No	Yes	Yes	No	No	No	gastric cancer	2017-02	59	pathological biopsy	adenocarcinoma	low	II	surgery	lung cancer	2018-11	60	21	metachronous	needle biopsies	squamous cell carcinomas	low	III	nutritional support	2019-06	death	28
56	male	1948-09	50	170	17.301	No	Yes	No	No	No	No	No	gastric cancer	2018-07	69	endoscopic biopsy	adenocarcinoma	low	II	nutritional support	pancreatic cancer	2018-07	69	0	synchronous	enhanced CT	adenocarcinoma	high	III	nutritional support	survival	death	3
57	male	1939-03	71	170	24.5675	No	No	No	No	No	No	No	gastric cancer	2013-04	74	pathological biopsy	adenocarcinoma	low	II	surgery	prostate cancer	2015-03	76	23	metachronous	needle biopsies	adenocarcinoma	middle	I	nutritional support	survival	live	106
58	female	1942-01	61	155	25.3902	No	Yes	No	Yes	No	No	No	gastric cancer	2017-06	75	endoscopic biopsy	adenocarcinoma	low	III	nutritional support	esophageal cancer	2017-06	75	0	synchronous	endoscopic biopsy	squamous cell carcinomas	middle	III	nutritional support	2017-07	death	1
59	female	1973-01	44	163	16.5607	No	No	No	No	No	No	No	gastric cancer	2013-05	40	pathological biopsy	adenocarcinoma	low	II	surgery+chemotherapy	colon cancer	2015-06	42	25	metachronous	pathological biopsy	adenocarcinoma	low	I	surgery+radiotherapy	2018-08	death	27
60	male	1941-06	81	176	26.1493	No	No	No	Yes	No	No	No	gastric cancer	2015-01	73	pathological biopsy	adenocarcinoma	low	II	surgery	lung cancer	2015-10	73	9	metachronous	needle biopsies	squamous cell carcinomas	high	I	nutritional support	2015-07	death	23
61	male	1943-05	56	164	20.8209	Yes	No	No	Yes	No	No	No	gastric cancer	2018-03	74	pathological biopsy	adenocarcinoma	low	II	surgery	esophageal cancer	2018-03	74	0	synchronous	pathological biopsy	squamous cell carcinomas	middle	I	surgery	2019-02	death	11
62	male	1953-06	55	170	19.0311	No	No	No	No	No	No	No	gastric cancer	2014-11	61	endoscopic biopsy	adenocarcinoma	low	II	chemotherapy	esophageal cancer	2014-11	61	0	synchronous	endoscopic biopsy	squamous cell carcinomas	middle	III	chemotherapy	2015-12	death	13
63	male	1945-08	87	170	30.1038	Yes	No	No	No	Yes	Yes	Yes	gastric cancer	2019-04	73	endoscopic biopsy	adenocarcinoma	low	III	nutritional support	esophageal cancer	2019-04	73	0	synchronous	endoscopic biopsy	adenocarcinoma	low	IV	nutritional support	2019-08	death	4
64	female	1951-09	57	156	23.4221	No	No	No	No	No	No	No	gastric cancer	2018-11	67	endoscopic biopsy	adenocarcinoma	low	II	nutritional support	cholangiocarcinoma	2018-11	67	0	synchronous	endoscopic biopsy	adenocarcinoma	middle	IV	nutritional support	2019-04	death	3
65	male	1970-01	69	171	23.597	Yes	Yes	No	No	No	No	No	gastric cancer	2015-01	45	pathological biopsy	adenocarcinoma	low	II	surgery	gallbladder cancer	2015-07	47	6	synchronous	pathological biopsy	adenocarcinoma	middle	I	surgery+chemotherapy	2016-12	death	42
66	male	1945-01	57	160	22.2656	Yes	No	Yes	No	No	No	No	gastric cancer	2016-03	71	endoscopic biopsy	high-grade intraepithelial neoplasia	low	II	nutritional support	lung cancer	2016-03	71	0	synchronous	needle biopsies	adenocarcinoma	high	III	nutritional support	survival	death	2
67	male	1955-08	60	170	20.7612	No	No	Yes	No	No	No	No	gastric cancer	2017-10	62	endoscopic biopsy	adenocarcinoma	low	III	nutritional support	esophageal cancer	2017-10	62	0	synchronous	endoscopic biopsy	adenocarcinoma	high	III	nutritional support	2017-11	death	1
68	male	1958-01	62	174	20.4783	No	No	No	No	No	No	No	gastric cancer	2019-01	61	endoscopic biopsy	adenocarcinoma	low	III	chemotherapy	esophageal cancer	2019-01	61	0	synchronous	endoscopic biopsy	adenocarcinoma	low	IV	chemotherapy	2020-11	death	22
69	male	1968-07	52	175	16.9796	Yes	Yes	No	No	No	No	No	gastric cancer	2016-03	47	pathological biopsy	adenocarcinoma	low	I	surgery	liver cancer	2017-12	48	21	metachronous	needle biopsies	adenocarcinoma	high	I	nutritional support	2018-06	death	27
70	male	1963-07	70	170	24.2215	No	No	No	No	No	No	No	gastric cancer	2011-06	47	pathological biopsy	adenocarcinoma	low	I	surgery+chemotherapy	colon cancer	2012-07	47	13	metachronous	pathological biopsy	adenocarcinoma	middle	I	surgery+chemotherapy	2016-11	live	128
71	female	1972-09	49	156	20.1348	No	No	No	No	No	No	No	gastric cancer	2014-12	42	pathological biopsy	adenocarcinoma	low	II	surgery+chemotherapy	rectal cancer	2019-03	47	51	metachronous	pathological biopsy	adenocarcinoma	high	II	surgery+chemotherapy	2020-09	death	69
72	female	1958-03	31	155	12.9032	No	No	No	Yes	No	No	No	gastric cancer	2017-12	59	pathological biopsy	adenocarcinoma	low	III	surgery+chemotherapy	rectal cancer	2017-12	59	0	synchronous	pathological biopsy	adenocarcinoma	low	II	surgery+chemotherapy	2018-08	death	6
73	female	1948-02	61	155	25.3902	No	No	No	No	No	No	No	gastric cancer	2013-09	65	pathological biopsy	adenocarcinoma	low	II	surgery	lung cancer	2015-10	67	49	metachronous	needle biopsies	squamous cell carcinomas	middle	I	nutritional support	2017-05	death	44
74	female	1964-04	56	161	21.6041	No	No	No	No	No	No	No	gastric cancer	2017-04	53	pathological biopsy	adenocarcinoma	low	III	surgery+chemotherapy	rectal cancer	2018-07	54	15	metachronous	endoscopic biopsy	adenocarcinoma	high	I	nutritional support	2019-06	death	26
75	male	1957-04	95	190	26.3158	No	Yes	No	No	No	Yes	No	gastric cancer	2017-06	60	endoscopic biopsy	adenocarcinoma	middle	II	chemotherapy	esophageal cancer	2017-06	60	0	synchronous	endoscopic biopsy	squamous cell carcinomas	high	I	chemotherapy	2018-07	death	13
76	male	1934-01	53	165	19.4674	No	No	No	No	No	No	No	gastric cancer	2012-07	78	pathological biopsy	adenocarcinoma	high	I	surgery	rectal cancer	2015-03	81	32	metachronous	endoscopic biopsy	adenocarcinoma	high	II	chemotherapy	2017-06	death	59
77	male	1957-01	54	165	19.8347	No	No	No	Yes	No	Yes	No	gastric cancer	2017-05	60	pathological biopsy	neuroendocrine tumors	high	III	surgery	esophageal cancer	2017-07	60	2	synchronous	endoscopic biopsy	squamous cell carcinomas	middle	IV	radiotherapy	2018-06	death	13
78	male	1947-06	57	172	19.2672	No	No	No	No	No	No	No	gastric cancer	2017-05	69	endoscopic biopsy	adenocarcinoma	middle	II	nutritional support	prostate cancer	2017-05	69	0	synchronous	needle biopsies	adenocarcinoma	middle	III	nutritional support	2017-01	death	7
